# Supplementary material for: Antifungal and Antiaflatoxigenic Activities of Massoia Essential Oil and C10 Massoia Lactone against Aflatoxin-Producing Aspergillus flavus
Source: MDPI journal article supplement (doi:10.3390/toxins15090571), 2023-09-16
Supplement: s1 [file s1]

Supplementary Data

# Antifungal and Antiaflatoxigenic Activities of Massoia Essential Oil and C10 Massoia Lactone against Aflatoxin-Producing *Aspergillus flavus*

Yubin Lee, Soo Jean Park, Kyeongnam Kim, Tae-Oh Kim and Sung-Eun Lee

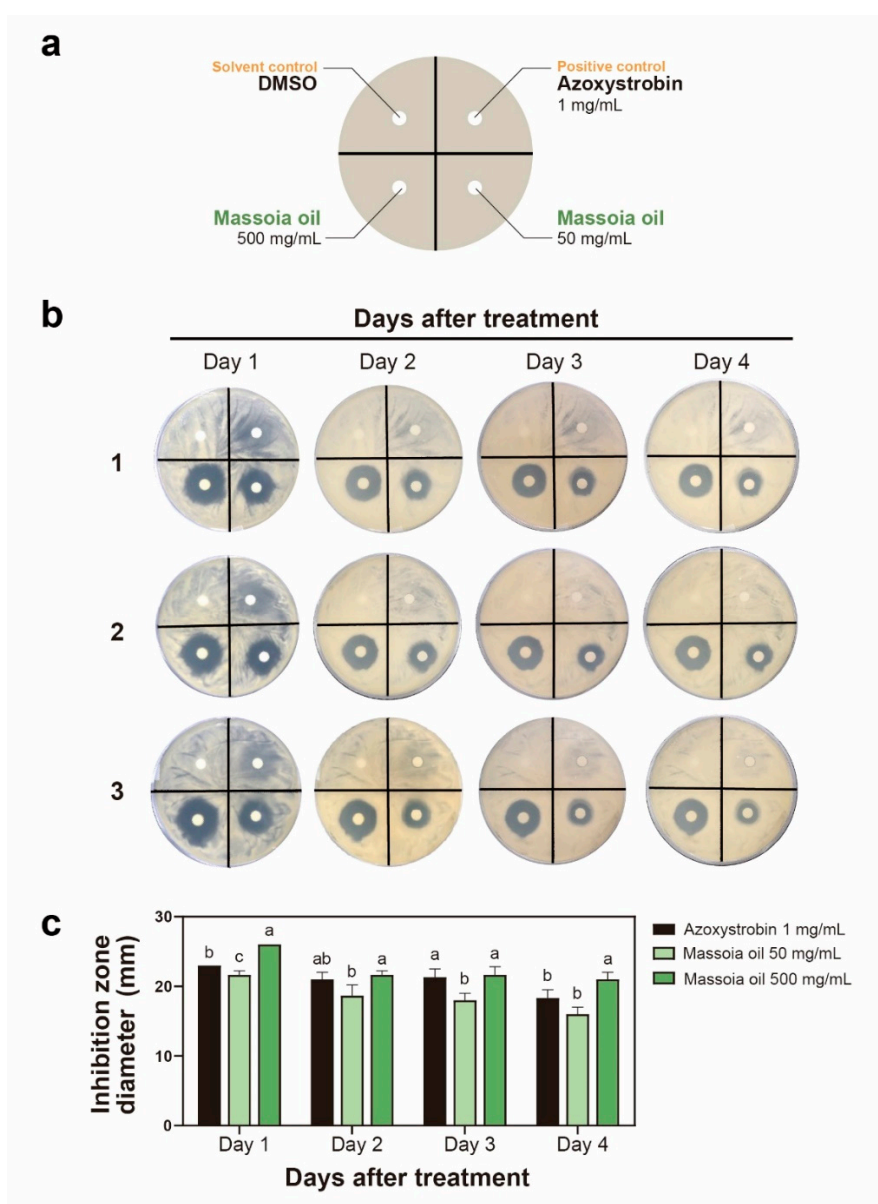

**Figure S1.** Antifungal activities of massoia essential oil at the treated concentration of 50 and 500 mg/mL on *Aspergillus flavus* ATCC 22546 during 4 day-incubation. Antifungal activities were measured with diameters (mm) of fungal growth zones in a potato dextrose agar (PDA) medium after treatments of massoia essential oil. Azoxystrobin at the concentration of 1 mg/mL was used as a positive control for this study. Diameters of fungal growth zones were measured every day. All experiments were done in triplicates. Statistical analyses were done using one-way ANOVA at the  $p < 0.05$  level. (a), schematic diagram of the antifungal measurement. (b), picture of antifungal activities of massoia essential oil according to the incubation time (day). (c), inhibition zones of fungal growth with statistical analysis.

**Table S1.** Inhibition rate compared with positive control (%) of massoia essential oil (MEO) and C10 massoia lactone (C10) on *Aspergillus flavus* ATCC 22546 growth in disc diffusion assay.

| Chemicals                          | Treated Concentration (mg/mL) | Inhibition Rate (%) *** |
|------------------------------------|-------------------------------|-------------------------|
| Negative control (DMSO *)          | –                             | 0                       |
| Positive control (Azoxystrobin **) | 1                             | 100                     |
| MEO                                | 0.5                           | 0                       |
|                                    | 2.5                           | 45.0±0.0                |
|                                    | 5                             | 70.0±4.7                |
|                                    | 10                            | 75.0±5.3                |
|                                    | 25                            | 78.8±3.1                |
|                                    | 50                            | 92.5±1.8                |
| C10                                | 0.5                           | 0                       |
|                                    | 2.5                           | 41.7±4.2                |
|                                    | 5                             | 45.0±4.2                |
|                                    | 10                            | 67.6±2.8                |
|                                    | 25                            | 82.2±1.6                |
|                                    | 50                            | 91.2±2.8                |

\* DMSO also called dimethylsulfoxide is employed to dissolve MEO and C10. \*\* Azoxystrobin was used as a positive control and it was used to determine the relative inhibition rates of MEO and C10. \*\*\* Inhibition rate compared with positive control (%) was calculated by comparing positive control with each diameter of inhibiting zone at 1 day after treatment. Inhibition rate compared with positive control (%) =  $\frac{D}{P.C} \times 100(\%)$ . D: Diameter of inhibition zone (mm) in the treated plate. P.C: Diameter of inhibition zone (mm) in the positive control plate.

**Table S2.** Inhibition rate (%) of massoia essential oil (MEO) and C10 massoia lactone (C10) on *Aspergillus flavus* ATCC 22546 growth in agar dilution method.

| Chemicals                          | Treated Concentration (mg/mL) | Inhibition Rate (%) *** |
|------------------------------------|-------------------------------|-------------------------|
| Negative control (DMSO *)          | –                             | 0                       |
| Positive control (Azoxystrobin **) | 0.1                           | 27.5±0.7                |
|                                    | 0.2                           | 35.2±3.7                |
| MEO                                | 0.05                          | 6.7±7.5                 |
|                                    | 0.1                           | 17.4±4.4                |
|                                    | 0.5                           | 88.7±1.7                |
|                                    | 1                             | 100±0.0                 |
|                                    | 2.5                           | 100±0.0                 |
|                                    | 10                            | 100±0.0                 |
| C10                                | 0.05                          | 4.4±7.3                 |
|                                    | 0.1                           | 17.4±13.5               |
|                                    | 0.5                           | 100±0.0                 |
|                                    | 1                             | 100±0.0                 |
|                                    | 2.5                           | 100±0.0                 |
|                                    | 10                            | 100±0.0                 |

\* DMSO also called dimethylsulfoxide is employed to dissolve MEO and C10. \*\* Azoxystrobin was used as a positive control and it was used to compare the relative inhibition rates of MEO and C10. \*\*\* Inhibition rate (%) was calculated by comparing negative control with each mycelial diameter at 7 day after treatment. Inhibition rate (%) =  $\frac{C-T}{C-d} \times 100(\%)$ . C: Mycelial diameter (mm) in the control plate. T: Mycelial diameter (mm) in the treatment plate. d: Diameter (mm) of *A. flavus* mycelial discs.

**Table S3.** List of primers used for qRT-PCR.

| Gene Symbol      | Gene Function           | Primer Sequences (5'-3') |                      |
|------------------|-------------------------|--------------------------|----------------------|
| <i>β-tubulin</i> | Housekeeping gene       | F                        | CTCCGTTCTGAGTTGACCC  |
|                  |                         | R                        | GAGCAGGTGAGGTAACGACC |
| <i>aflC</i>      | Polyketide synthase     | F                        | ACTGGCAACTGCAAACCCTA |
|                  |                         | R                        | CCAGCCGTTTGATGAACACC |
| <i>aflD</i>      | Reductase               | F                        | CCAACATGCACGACTATGCG |
|                  |                         | R                        | GCCGTGAGCCATTTGTTCTC |
| <i>aflE</i>      | NOR reductase           | F                        | CGTCTCTCAGTCAAGGCCAG |
|                  |                         | R                        | TCGCATCACTTCCTCCACAC |
| <i>aflG</i>      | P450 monooxygenase      | F                        | GCATCTTCCACCCTTCCACA |
|                  |                         | R                        | GAAAAGGCCAACAGTCGTCG |
| <i>aflK</i>      | VERB synthase           | F                        | ATGCAGGGAAAGACCTTGGG |
|                  |                         | R                        | AACTATCGTCGCCAACGTGA |
| <i>aflL</i>      | Desaturase              | F                        | GCAACAGTTTGTGGCCGATT |
|                  |                         | R                        | ATGAACTTGTCGGCGTGAGT |
| <i>aflO</i>      | O-methyltransferase B   | F                        | AATTCCCCGCTCCTGACAAG |
|                  |                         | R                        | CGACCAGGAAGGTTGGGAAA |
| <i>aflQ</i>      | Oxidoreductase          | F                        | GATAACCCGGACGACCTTCG |
|                  |                         | R                        | CTCATCTTTTCCATGCGGCG |
| <i>aflR</i>      | transcription regulator | F                        | TGCAGTCAATGGAACACGGA |
|                  |                         | R                        | TGGGGGTCCCTACTTCCAAA |
| <i>aflS</i>      | transcription regulator | F                        | GTGGAGGATACGCTCACTCG |
|                  |                         | R                        | GTGATGGAAATTGCGGAGCG |
| <i>erg28</i>     | 14-α-demethylase        | F                        | TTGCCTCCTTTTGAGGGCTT |
|                  |                         | R                        | CACAGGGGTCGTGATGTTGT |

**Table S4.** Liquid chromatography triple quadrupole mass spectrometer (LC-MS/MS) parameters for the analysis of aflatoxin B<sub>1</sub>, B<sub>2</sub>, G<sub>1</sub>, and G<sub>2</sub> in multiple reactions monitoring mode.

| Aflatoxin      | Molecular Formula                              | Molecular Weight (g/mol) | Retention Time (min) | Precursor Ion [M+H] <sup>+</sup> (m/z) | Production (m/z) | Dwell Time (ms) | Fragmentor Voltage (V) | Collision Energy (V) |
|----------------|------------------------------------------------|--------------------------|----------------------|----------------------------------------|------------------|-----------------|------------------------|----------------------|
| B <sub>1</sub> | C <sub>17</sub> H <sub>12</sub> O <sub>6</sub> | 312                      | 8.80                 | 313.1                                  | 285 *            | 200             | 100                    | 20                   |
|                |                                                |                          |                      |                                        | 241              |                 |                        | 40                   |
| B <sub>2</sub> | C <sub>17</sub> H <sub>14</sub> O <sub>6</sub> | 314                      | 8.61                 | 315.1                                  | 287.1 *          | 200             | 100                    | 35                   |
|                |                                                |                          |                      |                                        | 259.1            |                 |                        | 35                   |
| G <sub>1</sub> | C <sub>17</sub> H <sub>12</sub> O <sub>7</sub> | 328                      | 8.32                 | 329.1                                  | 243 *            | 200             | 110                    | 25                   |
|                |                                                |                          |                      |                                        | 200              |                 |                        | 45                   |
| G <sub>2</sub> | C <sub>17</sub> H <sub>14</sub> O <sub>7</sub> | 330                      | 8.13                 | 331.1                                  | 313 *            | 200             | 110                    | 25                   |
|                |                                                |                          |                      |                                        | 245.1            |                 |                        | 30                   |

\* Quantification product ions.
